1 **Incorporating topological and age uncertainty into event-based**  
2 **biogeography supports paleo-islands in Galapagos and ancient**  
3 **connections among Neotropical dry forests**

4 Ivan L. F. Magalhaes<sup>1\*</sup>, Adalberto J. Santos<sup>2</sup> & Martín J. Ramírez<sup>1</sup>

5 <sup>1</sup>División Aracnología, Museo Argentino de Ciencias Naturales "Bernardino Rivadavia" — CONICET,  
6 Av. Ángel Gallardo 470, C1405DJR, Buenos Aires, Argentina

7 <sup>2</sup>Departamento de Zoologia, Instituto de Ciências Biológicas, Universidade Federal de Minas Gerais, Av.  
8 Antonio Carlos 6627, 31270-901, Belo Horizonte, Minas Gerais, Brazil

9 \*Corresponding author: magalhaes@macn.gov.ar

10

11 Running title: Phylogenetic uncertainty in event-based biogeography

12

13 **Abstract.** Event-based biogeographic methods, such as dispersal-extinction-  
14 cladogenesis, have become increasingly popular for attempting to reconstruct the  
15 biogeographic history of organisms. Such methods employ distributional data of  
16 sampled species and a dated phylogenetic tree to estimate ancestral distribution ranges.  
17 Because the input tree is often a single consensus tree, uncertainty in topology and age  
18 estimates are seldom taken into account, even when they may affect the outcome of  
19 biogeographic estimates. Even when such uncertainties are taken into account for  
20 estimates of ancestral ranges, they are usually ignored when researchers compare  
21 competing biogeographic hypotheses. We explore the effect of incorporating this  
22 uncertainty in a biogeographic analysis of the 21 species of sand spiders (Sicariidae:  
23 *Sicarius*) from Neotropical xeric biomes, based on a total-evidence phylogeny including  
24 a complete sampling of the genus. By using a custom R script made available here, we

25 account for uncertainty in ages and topology by estimating ancestral ranges over a  
26 sample of trees from the posterior distribution of a Bayesian analysis, and for  
27 uncertainty in biogeographic estimates by using stochastic maps. This approach allows  
28 for counting biogeographic events such as dispersal among areas, counting lineages  
29 through time per area, and testing biogeographic hypotheses, while not overestimating  
30 the confidence in a single topology. Including uncertainty in ages indicates that *Sicarius*  
31 dispersed to the Galapagos Islands when the archipelago was formed by paleo-islands  
32 that are now drowned; model comparison strongly favors a scenario where dispersal  
33 took place before the current islands emerged. We also investigated past connections  
34 among currently disjunct Neotropical dry forests; failing to account for topological  
35 uncertainty underestimates possible connections among the Caatinga and Andean dry  
36 forests in favor of connections among Caatinga and Caribbean+Mesoamerican dry  
37 forests. Additionally, we find that biogeographic models including a founder-event  
38 speciation parameter (“+J”) are more prone to suffer from the overconfidence effects of  
39 estimating ancestral ranges using a single topology. This effect is alleviated by  
40 incorporating topological and age uncertainty while estimating stochastic maps,  
41 increasing the similarity in the inference of biogeographic events between models with  
42 or without a founder-event speciation parameter. We argue that incorporating  
43 phylogenetic uncertainty in biogeographic hypothesis-testing is valuable and should be  
44 a commonplace approach in the presence of rogue taxa or wide confidence intervals in  
45 age estimates, and especially when using models including founder-event speciation.

46

47 **Keywords.** BioGeoBEARS, Caatinga, dispersal, Galapagos, Neotropical, speciation,  
48 spiders, tropical dry forests, vicariance

## 49 **Introduction**

50           The reconstruction of the biogeographic history of organisms is one of the main  
51 aims of systematic biology. Based on a known phylogeny, researchers may attempt to  
52 glimpse into the ancestral area where a particular clade originated (Huelsenbeck &  
53 Imennov 2002), infer the number and direction of dispersal events (Dupin et al. 2017),  
54 or estimate the number of vicariant events along the evolutionary history of the group  
55 (Ronquist 1997). More often than not, the geographic distribution of a group is known  
56 only from its extant species, occasionally accompanied by a few fossil forms. This  
57 represents but a fraction of the diversity of a group throughout its history, and we  
58 cannot directly assess the distribution range of unknown extinct species. Thus,  
59 biogeographers interested in such questions must resort to methods that attempt to  
60 estimate past distribution ranges from the data available from known species.

61           Initially, such estimates of ancestral geographical ranges relied on algorithms  
62 such as Fitch or Camin-Sokal parsimony optimization (Bremer 1992; Huelsenbeck &  
63 Imennov 2002). This approach treats distribution ranges as discrete characters and  
64 optimizes them as such along the phylogenies, but has some drawbacks. For instance,  
65 only tips of the phylogeny may be ‘polymorphic’ and occur in more than one area  
66 simultaneously, and important biogeographic processes such as vicariance are not  
67 modeled at all. This changed with the advent of event-based biogeography methods,  
68 pioneered by dispersal-vicariance analysis (DIVA; Ronquist 1997). Such methods  
69 attempt to explain the current distribution of organisms by modeling biogeographic  
70 events such as dispersal (colonization of a new area), range contractions (extinction of a  
71 species in a particular area) and vicariance (allopatric speciation leading to each  
72 descendant inheriting only part of the range of the ancestor species). DIVA brought a  
73 fundamental advance with respect to previous methods: changes in a lineage’s

74 geographic distribution may happen as anagenetic events (dispersal or extinction along  
75 branches) or cladogenetic events (vicariance at nodes). Furthermore, the states in such  
76 estimates are geographic ranges, which may consist of one or more areas; thus, both tips  
77 and ancestors may be ‘polymorphic’. By using a parsimony framework, DIVA assigns  
78 costs to dispersal and extinction events, and treats vicariance as the null expectation for  
79 explaining biogeographic history. A similar rationale was used later to elaborate a  
80 likelihood-based approach to ancestral range estimation named dispersal-extinction-  
81 cladogenesis analysis (DEC; Ree et al. 2005; Ree & Smith 2008). DIVA’s parsimony-  
82 based optimization is agnostic regarding branch lengths. On the other hand, DEC  
83 models anagenetic events as a time-continuous function that takes branch lengths into  
84 account; thus, longer branches are more likely to contain anagenetic events such as  
85 dispersal or extinction. More importantly, DEC can accommodate dated trees, and thus  
86 prior information on geological history can be provided for explicit testing of  
87 biogeographic hypothesis (Ree et al. 2005). Modifications of DIVA and DEC have been  
88 implemented and further elaborated in software packages for biogeography, such as  
89 RASP (Yu et al. 2015) and BioGeoBEARS (Matzke 2013a, 2013b). The latter has  
90 become particularly popular due to its flexible implementation of biogeographic models  
91 allowing for different types of cladogenetic events, such as vicariance, subset sympatry,  
92 and founder-event speciation (see Matzke 2013b, 2014); in addition, all models are  
93 implemented in a likelihood framework, allowing direct model comparison.

94         A unifying feature of all methods discussed above is that they rely on the  
95 knowledge of the geographic distribution of each of the taxa, and of the phylogenetic  
96 tree describing their interrelationships. As in any comparative method, estimates of  
97 ancestral ranges cannot be more reliable than the data underlying it. The knowledge of  
98 the geographic distribution of tips may be affected by the Linnean and Wallacean

99 shortfalls (Hortal et al. 2015), i.e., gaps in the data about existing species and their  
100 distributions. However, it is arguable that estimates of ancestral ranges are usually  
101 carried out by systematists that specialize in a particular taxon, who strive to include all  
102 or most known species and distribution records in their sampling, so as to mitigate any  
103 negative effects of such shortfalls. On the other hand, the knowledge of the underlying  
104 phylogenetic tree can be potentially more problematic. In recent years, the accumulation  
105 of genomic-scale studies has shown that the phylogenetic relationships of some clades  
106 are elusive even with massive quantities of data due to e.g., incomplete lineage sorting  
107 and/or very short internodes (e.g., Suh 2016; Ballesteros & Sharma 2019), and some  
108 portions of such trees are shrouded in topological uncertainty. There is uncertainty not  
109 only regarding the topology, but also in the estimates of divergence times. This  
110 uncertainty in age estimates is also resistant to the accumulation of genetic markers (see  
111 Ho & Duchêne 2014). Rates of molecular evolution rarely conform to a strict molecular  
112 clock, and branch lengths estimated from molecular sequences are a product of  
113 substitution rate and time, such that each of these two parameters are individually non-  
114 identifiable (Drummond et al. 2006). In addition, estimation of dated trees builds upon  
115 several assumptions, some of which may be too daring for empirical datasets (Bromhan  
116 2019), and require fossil or other external calibrations, whose selection and justification  
117 is not free of difficulties (Parham et al. 2012, Warnock et al. 2015). In this scenario,  
118 analyses that depend on phylogenetic trees might benefit from accounting for any  
119 uncertainties regarding their topologies and/or ages (Huelsenbeck et al. 2000). In this  
120 paper, we refer to “phylogenetic uncertainty” as any uncertainty regarding the topology  
121 and/or node ages.

122           Efforts have been made to incorporate such phylogenetic uncertainty into  
123 ancestral range estimation. Nylander et al. (2008) used multiple trees from the posterior

124 distribution of a Bayesian analysis to estimate ancestral ranges, and thus infer the  
125 biogeographic history of a clade of birds whose phylogeny had proven difficult to solve;  
126 they called this approach Bayes-DIVA. Similar pipelines have been incorporated into  
127 RASP (S-DIVA; Yu et al. 2010) and BioGeoBEARS (using the  
128 *run\_bears\_optim\_on\_multiple\_trees* function). These functions summarize estimates of  
129 ancestral ranges of several trees on a target tree, such as a majority-rule consensus (as  
130 output by e.g., MrBayes) or a maximum clade credibility tree (MCC tree; as output by  
131 e.g., BEAST) and are routinely employed by researchers interested in incorporating  
132 phylogenetic uncertainty (e.g., Baker et al. 2020, Santaquiteria et al. in press). However,  
133 the results are summarized in a single tree, and the underlying variability in the  
134 estimates is difficult to grasp. Furthermore, the individual underlying trees usually are  
135 not taken into account when comparing competing biogeographic hypotheses. We argue  
136 that it is important to understand the effect of analyzing individual trees during  
137 hypothesis-testing, especially if confidence intervals of age estimates cross boundaries  
138 of time slices in time-stratified analyses.

139         In addition to phylogenetic uncertainty, there is the uncertainty associated with  
140 stochastic time-continuous models such as DEC. Because of this, estimates for ancestral  
141 nodes might include several possible states, each with its own probability. This hampers  
142 counting biogeographic events or estimating their ages. Dupin et al. (2017) solved this  
143 by introducing biogeographic stochastic mapping (BSM), a method to count  
144 biogeographic events while accounting for uncertainty in ancestral range estimation.  
145 Several replicates are run, and in each one the states at each node are resolved by taking  
146 into account the probabilities of each state. This allows, for instance, counting the  
147 number of dispersal events among areas, or estimating the time when such transitions  
148 took place. This approach is elegant, but it is usually employed on estimates based on a

149 single tree, and thus incorporates uncertainty on ancestral range estimates conditional on  
150 a single topology. If there is topological uncertainty leading to different ancestral range  
151 estimates, this approach will underestimate the uncertainty in the biogeographic  
152 reconstruction (Fig. 1). Furthermore, using a single tree as input ignores the confidence  
153 intervals in age estimates, which are usually large. We argue that it would be productive  
154 to run stochastic maps over a sample of trees to incorporate both phylogenetic and  
155 stochastic uncertainty simultaneously.

156         To illustrate our argument, we explore the effect of uncertainty in the  
157 biogeographic history of Neotropical sand spiders (*Sicarius*). These spiders represent an  
158 ideal system for this test because they are moderately diverse (21 species) and all  
159 species have been included in a dated total-evidence phylogeny (Magalhaes et al. 2019).  
160 The genus has a disjunct distribution, and each species is restricted to one or two arid  
161 areas surrounded by mesic habitats; phylogeographic and phylogenetic patterns suggest  
162 they are very poor dispersers (Binford et al. 2008; Magalhaes et al. 2014, 2017). Thus,  
163 their areas of distribution are clearly delimited and could be interpreted as “islands” of  
164 dry biomes inserted in a matrix of unsuitable humid habitats. Because of their  
165 distribution and moderate diversity, most of the biogeographic transitions should be  
166 straightforward to interpret, thus allowing us to easily measure the effects of  
167 phylogenetic uncertainty in biogeographic estimates.

168         Specifically, we focus on two particularly pressing questions. The first is the  
169 timing of colonization of the Galapagos archipelago by *Sicarius*. The Galapagos are  
170 currently inhabited by a single sand spider, *Sicarius utrifomis* (Butler), which is sister  
171 to *S. peruensis* (Keyserling) from the Peruvian coastal deserts (Magalhaes et al. 2017,  
172 2019). Although the oldest emerged islands are ~3.5 million years (Myr) old (White  
173 1993), geological evidence suggests that the archipelago existed for at least 14.5 Myr,

174 when it was formed by paleo-islands that are now drowned (Christie et al. 1992; Werner  
175 et al 1999). The age of divergence between *S. utiformis* and *S. peruensis* has a 95%  
176 confidence interval between 1.2 and 22.2 Myr (median 9.7; Magalhaes et al. 2019), and  
177 thus it is possible that this pair of species split before the current islands were formed,  
178 but during the time the archipelago was formed by paleo-islands. This makes this  
179 system ideal to test the effect of the uncertainty of age estimates in biogeographic  
180 inference.

181         The second question is the estimation of the ancestral distribution range of a  
182 clade endemic to the Brazilian Caatinga. This area is one of the largest and most diverse  
183 tropical dry forests in the world (DRYFLOR 2016), and six *Sicarius* species inhabit the  
184 region (Magalhaes et al. 2017). These six species form a well-supported monophyletic  
185 group (Magalhaes et al. 2019), suggesting a single colonization of this area. In this case,  
186 from which area did the ancestor of this clade come? The American tropical dry forests  
187 and other xeric biomes such as deserts and scrublands currently have a disjunct  
188 distribution, but the similarity in their biota suggests they have been connected in the  
189 past (see DRYFLOR 2016). Basing on plant distributions, some argued that the  
190 Caatinga could have been connected to dry forests in Bolivia and Argentina, or to dry  
191 forests in the Caribbean coast of northern South America (Prado & Gibbs 1993;  
192 Pennington et al. 2000); these connections would have taken place by expansion of dry  
193 forests over areas that now are covered by mesic biomes. Connections between the  
194 Caatinga and the Caribbean dry forests imply a northern route passing through present-  
195 day Amazon (a rainforest); alternatively, the Caatinga could have been connected with  
196 southern formations, such as the Monte or the Chiquitano dry forests, passing through  
197 present-day Cerrado (a savannah). We thus aim at identifying the most likely route for  
198 the occupation of the Caatinga by sand spiders. However, this is hampered by the fact

199 that one species, *Sicarius andinus* Magalhaes et al. from the Peruvian Andes, is a rogue  
200 taxon in the phylogeny and does not have a well-resolved phylogenetic position  
201 (Magalhaes et al. 2019). Different positions of this species may yield different  
202 biogeographic reconstructions for the Caatinga clade, and thus we must take this into  
203 account.

204         In this paper, we test the effect of taking phylogenetic uncertainty into account  
205 in the biogeographic inferences of the two pragmatic scenarios mentioned above. We  
206 combine processing of several trees of the stationary phase of the Markov chains of a  
207 Bayesian analysis with biogeographic stochastic maps for each tree, so that both  
208 phylogenetic and biogeographic uncertainties are considered simultaneously.  
209 Specifically, we test (1) whether data from sand spiders support dispersal to Galapagos  
210 in the last 3.5 Myr (age of oldest emerged island), in the last 14.5 Myr (age of oldest  
211 known drowned paleo-island) or an unconstrained model (representing the possibility of  
212 older, yet undetected paleo-islands), and (2) whether the Caatinga was connected to  
213 northern (Caribbean, Mesoamerican or Andean dry forests) or southern (Chiquitano dry  
214 forests or Monte) biomes, as well as the age of such connections. We anticipate that  
215 analyzing a sample of trees, instead of a single target tree, provides invaluable insights  
216 for testing competing biogeographic hypotheses. Finally, we provide scripts for R (R  
217 Core Team 2020) to replicate the analyses described below, in the hope they will be  
218 useful for further studies.

219

## 220 **Material and Methods**

221         **Summaries of biogeographic inferences in face of uncertainty.** We prepared  
222 an R script to (1) sample  $n$  trees randomly from BEAST output files and prune them to

223 the taxa of interest, (2) estimate ancestral ranges using BioGeoBEARS for each of these  
224 trees, (3) run biogeographic stochastic maps for each of these estimates, and finally (4)  
225 parse the results and summarize them. The summaries include: (1) parameter estimates,  
226 log-likelihoods and AICc for ancestral range estimates of each tree, (2) tables  
227 containing the transitions between geographic ranges for each stochastic map of each of  
228 the  $n$  sampled trees, along with the age of such transitions; (3) a graphic of lineages  
229 through time per area averaged over all trees and stochastic maps; (4) tables with all  
230 possible geographic ranges in both rows and columns, and average counts of how many  
231 times a transition between a particular pair of ranges took place; such tables are broken  
232 down by each type of transition (dispersal, extinction, vicariance, etc.) and summarized  
233 in a table containing all types of transitions; and (5) a summary of the most common  
234 biogeographic transitions (as the mean number of transitions per BSM replicate). The  
235 script (Online Supplementary File S1) uses functions from the packages phytools  
236 (Revell 2012), ape (Paradis & Schliep 2019), sjmisc (Lüdecke 2018) and  
237 BioGeoBEARS (Matzke 2013a) and has been written as to be easily adapted to most  
238 datasets. The necessary input files are the same as those used in BioGeoBEARS, except  
239 that users may provide multiple trees instead of a single target tree.

240       **Model selection.** BioGeoBEARS implements three different biogeographic  
241 models that differ mainly in the events that may take place during cladogenesis when  
242 the ancestor has a widespread range (i.e., its range consists of two or more areas; see  
243 Matzke 2013b for a summary). DEC has an identical implementation to the model  
244 described by Ree & Smith (2008) and allows narrow vicariance (one descendant inherits  
245 exactly a single area, the other inherits the rest of the range) or subset sympatry (one  
246 descendant inherits exactly a single area, while the other inherits the whole distribution  
247 range of the ancestor). DIVA-like (DVL) allows the same cladogenetic events as the

248 original implementation of DIVA (Ronquist 1997): narrow vicariance (as in DEC) and  
249 wide vicariance (each descendant may inherit two or more areas from the ancestor).  
250 BAYAREA-like (BAL) does not allow changes in distribution ranges during  
251 cladogenesis, and each descendant inherits exactly the same range as the ancestor. Each  
252 of these three models can be modified by the addition of a “jump-dispersal” free  
253 parameter (“+J”) that allows for founder-event speciation during cladogenesis, i.e., one  
254 of the descendants occupies a single area that is not part of the range of the ancestor,  
255 while the other descendant inherits the same range as the ancestor (Matzke 2014). Thus,  
256 models including founder-event speciation are unique in that they allow dispersal to  
257 take place during cladogenetic events.

258         Biogeographic history may be estimated under each of these six models and the  
259 fit of the data to each of them can be compared by using the Akaike information  
260 criterion (AIC; Akaike 1973) and Akaike weights (AICw; Wagenmakers & Farrell  
261 2004). This procedure has been used to guide the selection of models that best explain  
262 the data and for testing biogeographic hypotheses (Matzke 2013b, 2014). We here  
263 estimate the fit of the data to six different models (DEC, DVL, BAL, DEC+J, DVL+J,  
264 BAL+J) for initial exploration of the behavior of the estimates. The script used for  
265 model selection can be found as Online Supplementary File S5.

266         We wanted to investigate whether the choice of a particular biogeographic  
267 model interacts in any way with the decision to run analyses over a sample of posterior  
268 trees. Thus, we ran the aforementioned script under two models with (DIVA-like+J and  
269 BAYAREA-like+J) and without (DIVA-like and DEC) founder-event speciation. The  
270 choice of these four models was done to include those that are a better fit to the data  
271 (DIVA-like and the +J variant), a model that is frequently used in empirical studies  
272 (DEC) and a model excluding the possibility of vicariance, and thus more similar to

273 simple parsimony reconstructions (BAYAREA-like+J). Each of these four models was  
274 used in both unconstrained and time-stratified analysis (see below), and using either the  
275 MCC tree or 100 posterior trees as source. In this latter case, to make these analyses  
276 directly comparable, the same sample of 100 trees was used for all runs. The  
277 combination of four biogeographic models, three time-stratification scenarios and two  
278 sources of trees resulted in 24 different runs (see Online Supplementary Figure S10).

279 **Phylogeny and distribution data.** To reconstruct the biogeographic history of  
280 *Sicarius*, we used a recently published phylogeny estimated using morphology and  
281 DNA sequences and dated using a combination of fossil calibrations and substitution  
282 rates for the histone H3, subunit A gene (Magalhaes et al. 2019). To understand the  
283 effect of incorporating uncertainty into biogeographic inference, analyses were run both  
284 on the maximum clade credibility (MCC) tree, and on a sample of 100 trees randomly  
285 drawn from the posterior distribution of the analysis, after removing the first 10%  
286 samples as burn-in (see above). *Hexophthalma* is the African sister group of *Sicarius*  
287 and was included in the analyses; the remaining terminals (*Loxosceles* and non-sicariid  
288 outgroups) were pruned from the trees. Species geographic ranges and trees can be  
289 found as Online Supplementary Files S2–S4.

290 The distribution of each species has been fully mapped in recent taxonomic  
291 publications on the genus including *ca.* 1800 adult specimens from natural history  
292 collections and recent field expeditions (Cala-Riquelme et al. 2017; Magalhaes et al.  
293 2017). We classified species distribution in ten areas: southern Africa deserts and xeric  
294 scrublands (F), Argentinean Monte (O), Atacama Desert and neighboring Chilean xeric  
295 scrublands (T), Sechura desert in the Peruvian coast (S), Andean dry forests (D),  
296 Chiquitano dry forests in Bolivia (C), Mesoamerican dry forests (M), dry forests in the  
297 Caribbean coast of Colombia (B), Caatinga dry forest in Brazil (I), and the Galapagos

298 Islands (G) (Fig. 2). Most of these areas are clearly delimited by geographic barriers  
299 such as oceans or mountain ranges, or correspond to well-recognized ecoregions or  
300 phytogeographic units (DRYFLOR 2016; Echeverría et al. 2018).

301 **BioGeoBEARS parameters and time stratification.** Sand spiders are poor  
302 dispersers (Magalhaes et al. 2019) and most species are restricted to a single area, with  
303 only two species occurring in two areas (Magalhaes et al. 2017). For this reason, and to  
304 speed up calculations, we restricted the maximum range size to include three areas.  
305 Likelihood calculations were carried out with *optimx* (Nash 2014). We compared  
306 ancestral ranges estimates under three scenarios: (1) unconstrained, allowing dispersal  
307 to the islands in any time, and (2 & 3) two different time-stratified scenarios, each with  
308 two time slices, where the Galapagos Islands were only available for occupation in the  
309 more recent slice. The boundary between the two slices was set to (2) 15 Myr, as  
310 geological evidence points to drowned islands that are at least 14.5 Myr old (Werner et  
311 al. 1999), or (3) 3.5 Myr, representing the approximate age of the oldest emerged island  
312 (White et al. 1993). Files for implementing the time-stratified model are available as  
313 Online Supplementary Files S6–8.

## 314 **Results**

315 **Model selection and estimates of ancestral ranges.** Regarding runs on MCC trees,  
316 overall DEC and DIVA-like resulted in similar ancestral range estimates among them,  
317 as did all models including a +J parameter. Parameter estimates and fit of data under  
318 different models are summarized in Online Supplementary Table 1. AIC values indicate  
319 that DIVA-like (log-likelihood: -51.29, AIC: 107.16) is the favored model among those  
320 not including a founder-speciation free parameter, while DIVA-like + J (log-likelihood:  
321 -44.24, AIC: 95.69) is favored among models including this parameter. Because it has

322 been demonstrated that models including founder-event speciation are prone to over-  
323 fitting (Ree & Sanmartín 2018; but see Matzke 2021), we here show results of the  
324 ancestral range estimates for the MCC tree under DIVA-like (Fig. 2); results under  
325 DIVA-like+J can be seen in Online Supplementary Figure 11.

326 We briefly investigated the effect of taking topological uncertainty into account  
327 during model selection by comparing the AICc values of the estimates of each of the  
328 100 trees for the models DIVA-like, DIVA-like+J and DEC. A histogram of such values  
329 displays some overlap among values of the different models (Online Supplementary  
330 Figure 12). However, for each individual tree the relationship of the preferred model is  
331 maintained (i.e., DIVA-like+J is preferred to DIVA-like, which is preferred to DEC),  
332 and is identical to the order found by running the analysis using the MCC tree. Thus,  
333 taking uncertainty into account has not affected the results of model selection.

334 **Lineages through time by area.** We estimated the number of lineages  
335 occupying each individual area through time. For this, the tree has been divided in 1  
336 Myr slices, and we counted the number of species in each area in each slice; widespread  
337 species are counted once in each area of their distribution range. The number of lineages  
338 in each area increases with time (Fig. 3) as a combination of within-area speciation and  
339 new dispersals into the area. When using a single tree, changes in diversity associated  
340 with cladogenetic events (e.g. within-area speciation or founder-event speciation)  
341 appear as abrupt increases in the plot (Fig. 3a, b). This effect is stronger in the model  
342 including founder-event speciation (Fig. 3a), but disappears when topological and age  
343 uncertainty is taken into account (Fig. 3c, d).

344 The results (Fig. 3) indicate that the ancestor of *Hexophthalma* + *Sicarius* lived  
345 in a range composed of (1) southern African deserts and scrublands, and (2) either the

346 Atacama desert, Sechura desert, or Argentinean Monte. These latter three have similar  
347 probabilities of being part of the ancestral range of sand spiders due to uncertainty in  
348 topology and biogeographic estimates. There has been a slow and steady increase in  
349 diversity in these temperate desert areas for the last ~100–80 Myr. On the other hand,  
350 lineages only started occupying tropical dry forests later, around 50 Myr. The Caatinga  
351 has become the most species-rich region relatively rapidly due to within-area speciation,  
352 mainly during the Miocene.

353 **Comparing time-stratified vs. unconstrained models in the face of age**  
354 **uncertainty.** We compared the fit of the data to unconstrained models (occupation of  
355 Galapagos possible at any time) to time-stratified models (occupation of Galapagos  
356 possible only in the last 15 Myr, or in the last 3.5 Myr). First, we investigated the  
357 inferred age of dispersal to the islands in the unconstrained analysis. In the analyses  
358 using a MCC tree as input, dispersal to the Galapagos has been inferred to occur more  
359 recently than 15 Myr in 72% (DIVA-like; mean 13.8 Myr) or 97% (DIVA-like+J; mean  
360 8.8 Myr) of the stochastic maps (Fig. 4a, b). Using a MCC tree results in sharper,  
361 overconfident distributions of the inferred ages of dispersal to the islands. This is  
362 especially notable in the case of the model with founder-event speciation, where 88% of  
363 the replicates inferred that colonization of the islands is a cladogenetic jump-dispersal  
364 with age equal to that of the *S. utiformis*–*S. peruensis* node in the MCC tree (Fig. 4a).  
365 In analyses using 100 posterior trees as input, dispersal to the Galapagos has been  
366 inferred to occur more recently than 15 Myr in 57.8% (DIVA-like; mean 16 Myr) or  
367 78.2% (DIVA-like+J; mean 12 Myr) of the replicates (Fig. 4c, d). Thus, when using 100  
368 posterior trees, inferred ages of the dispersal to Galapagos are older in average. In  
369 addition, the distribution of inferred ages is flatter, as it takes into account the

370 uncertainty in node ages; this reduces the difference between models with and without  
371 founder-event speciation.

372 We then compared the fit of the data to unconstrained model vs. time-stratified  
373 model allowing dispersal only in the last 15 Myr. Using the MCC tree, the data fit better  
374 to a stratified model under DIVA-like, DIVA-like+J, and BAYAREA-like+J, while it  
375 fits better to an unconstrained model under DEC (stars in Fig. 5). In all cases, however,  
376 the support for the preferred model is very weak, as the ratio between AICc weights of  
377 the preferred model range only between 1.29 to 2.58, and thus we cannot decisively  
378 reject any of the two models in favor of the other. When comparing models over 100  
379 posterior trees, we observed an interesting pattern. Again, in most trees the data fit  
380 slightly better a time-stratified scenario under DIVA-like, DIVA-like+J, and  
381 BAYAREA-like+J (in 58, 68 and 58 of the 100 trees, respectively), and an  
382 unconstrained scenario under DEC (in 91 of the trees), but relative supports in these  
383 cases are once again ambiguous (1.67–2.91). However, in the fewer cases of trees where  
384 the data fits better an unconstrained model, the median relative support is higher and  
385 shows decisive support for this model (5.00–151.74) (Fig. 5).

386 We suspected that this pattern might be due to the age of split between *S.*  
387 *utriformis*–*S. peruensis*. The confidence interval of this age spans a wide range (1.2–  
388 22.2 Myr) and actually crosses the boundary between the two time slices of the time-  
389 stratified model (15 Myr). To investigate this, we plotted the AICc weight of the  
390 unconstrained model against the age of the split (Fig. 5). The plot indicates that when  
391 the age of the split is younger than 15 Myr, there is weak support for the time-stratified  
392 model (DIVA-like and DIVA-like+J), to the unconstrained model (DEC), or the support  
393 to either of them is ambiguous (BAYAREA-like+J). On the other hand, the data fits  
394 better to the unconstrained model in all the 17 trees where the *S. utriformis*–*S. peruensis*

395 split is older than the boundary of the time slice (15 Myr). While this is true for the four  
396 biogeographic models employed, the effect is much stronger in models including a  
397 founder-event speciation parameter, which tend to favor the unconstrained model more  
398 strongly: the relative support for the unconstrained model is higher in DIVA-like+J  
399 ( $776.2 \pm 369$ ) and BAYAREA-like+J ( $85.7 \pm 110.86$ ) than in DIVA-like ( $37.81 \pm$   
400  $37.97$ ) and DEC ( $8.84 \pm 4.73$ ). Thus, in at least some of the trees from the posterior  
401 distribution, there is strong support for an unconstrained colonization of the Galapagos  
402 taking place before 15 Myr.

403 Finally, we compared the fit of the data to a model allowing dispersal to the  
404 Galapagos in the last 15 Myr (age of the oldest recorded paleo-islands) to a model  
405 allowing dispersal only in the last 3.5 Myr (age of the oldest emerged island). Under all  
406 biogeographic models, the model allowing dispersal in the last 15 Myr is strongly  
407 favored (Fig. 6). In the few trees where this split is younger than 3.5 Myr, the 15-Myr  
408 model is still strongly favored by DIVA-like and DEC, while support to either scenario  
409 is ambiguous in DIVA-like+J and BAYAREA-like+J. Thus, our data indicates that  
410 dispersal of sand spiders to the Galapagos took place before the appearance of the oldest  
411 emerged island.

412 **Ancestral range estimates of particular nodes in the face of topological**  
413 **uncertainty.** We estimated the most likely state in the root node (corresponding to the  
414 split between African *Hexophthalma* and Neotropical *Sicarius*). For simplicity, we only  
415 report the results under DIVA-like, which are similar to those of other models. Analyses  
416 using the MCC tree yield estimates for an ancestral range most likely including southern  
417 African scrublands and one of the temperate American deserts (Sechura, Atacama or  
418 Monte): most likely ranges are FOT (30.7%), FOS (30.3%), FTS (24.6%), FO (4.8%),  
419 FT (3.8%) and FS (3.8%), summing to a total of 98.3%. The most likely ranges across

420 the 100 trees are FOT (27.8%), FOS (24.4%), FTS (22.4%), FO (5.5%), FT (4.2%) and  
421 FS (3.7%), total 88.1%. These latter ranges have their likelihoods slightly diminished  
422 because of an increase in the likelihood of ranges including Andean dry forests, namely  
423 FOD (2.3%), FSD (2%), FTD (1.5%). At any rates, these changes are rather small, and,  
424 even in the face of topological uncertainty, we can be fairly confident that the ancestor  
425 of *Sicarius* + *Hexophthalma* lived in a range including deserts and xeric scrublands of  
426 southern Africa and southern or western South America.

427         We used stochastic maps to estimate the ancestral range that sourced species to  
428 the Brazilian Caatinga. In more than 99.9% of the maps, occupation of the Caatinga is  
429 the result of a single dispersal event, either jump-dispersal (DIVA-like + J) or  
430 anagenetic dispersal to a wide range including the Caatinga immediately followed by  
431 vicariance (DIVA-like). Using 100 stochastic maps resolved from the ancestral range  
432 estimates on the MCC tree, the most likely candidates for the area that originated this  
433 single dispersal are Mesoamerican dry forests, Caribbean dry forests, Argentinean  
434 Monte, Atacama desert or Andean dry forests (Table 1). When accounting for  
435 topological uncertainty using 100 stochastic maps for each of the 100 posterior trees,  
436 the results are similar but there is a substantial increase in the likelihood of Andean dry  
437 forests to be the source area, and this area actually becomes the most likely source  
438 (Table 1); using only the MCC tree underestimates this possibility. This increase in the  
439 likelihood is related to the presence of the rogue taxon *Sicarius andinus*, who inhabits  
440 Andean dry forests and is resolved as the sister taxon to the Caatinga clade in several  
441 trees of the posterior distribution.

442         We inferred the age of the dispersal event to the Caatinga and discovered a  
443 similar pattern to what we observed regarding the Galapagos. When using a MCC tree,  
444 the estimates are sharp and overconfident (Fig. 7a, b), especially in the analysis

445 including founder-event speciation, which shows four peaks closely tied to the ages of  
446 the cladogenetic events immediately leading to the Caatinga clade. Using 100 posterior  
447 trees to estimate the age of the dispersal event incorporates the uncertainty in the node  
448 ages, and reduces the differences between DIVA-like and DIVA-like+J (Fig. 7c, d).

449 **Summary of biogeographic events in the face of uncertainty.** We were able  
450 to count the most frequently inferred biogeographic events (dispersals, extinctions,  
451 vicariance and within-area speciation) by taking into account uncertainty in topology  
452 and ancestral range estimates. The results are summarized in Fig. 2 and Table 2. A  
453 substantial fraction of *Sicarius* diversity has been generated by within-area speciation,  
454 mainly in the Caatinga and the Atacama and, to a lesser extent, in the Monte scrubland,  
455 Sechura desert and Andean dry forests. Three of the dispersal events are robust to both  
456 types of uncertainty: one from the Sechura to Galapagos, one from the Atacama to  
457 Sechura, and one from the Andes to the Chiquitano dry forest. Other dispersal events  
458 are sensitive to uncertainty in topology and/or in ancestral range estimates, but generally  
459 involve geographically close areas, such as Mesoamerican and Caribbean dry forests,  
460 Atacama and Monte, and Atacama and Andes. The Caatinga has exchanged lineages  
461 with a single other area whose identity is uncertain, but candidates are Mesoamerican,  
462 Caribbean or Andean dry forests and, less likely, the Atacama desert and the Monte  
463 scrubland.

464

## 465 **Discussion**

466 **Inference of biogeographic events in the face of uncertainty.** In recent times,  
467 we have learned that tree topology may reach stability with more sequence data, but  
468 some clades remain elusive even in massive phylogenomic datasets (Suh 2016,

469 Ballesteros & Sharma 2019). In addition, estimates of ages of divergence are based on  
470 limited data and many assumptions (e.g. the placement of fossil calibrations) and will  
471 always be uncertain; as Bromham (2019) neatly pointed out, “paleontological evidence  
472 and molecular dates paint history with a broad brush, not fine penwork”. In this  
473 scenario, it seems unwise to put too much faith in a single tree, which represents only  
474 one of many similarly probable topologies and age estimates. Our results corroborate  
475 this: when combining biogeographic stochastic maps with a sample of trees, there are  
476 valuable insights to be gained.

477         We illustrate this concept by studying particular biogeographic events.  
478 Biogeographic maps can be used to estimate both transitions among areas and ages of  
479 biogeographic events (Dupin et al. 2017). However, they are tied to the particular tree  
480 that is used as a base, which may bias the biogeographic inferences. When we estimated  
481 biogeographic transitions between the Caatinga and other dry Neotropical areas,  
482 analyses using only the MCC tree underestimated the possibility of dispersal coming  
483 from the Andes when compared to the analyses using 100 posterior trees (Table 1).  
484 Perhaps more importantly, the inferred ages of biogeographic events are severely biased  
485 when stochastic maps are run on a single tree (Figs 3a, b, 4a, b, 7a, b). This is because  
486 stochastic maps can only infer the ages of events along the branches and nodes of that  
487 particular tree. This bias is potentially problematic, because many biogeographic studies  
488 are aimed at linking phylogenetic and geological history; the correlation (or lack  
489 thereof) of node ages (or biogeographic events) with geological events is often used to  
490 reach biological conclusions (e.g. Renner 2016). If such uncertainty is not taken into  
491 account, researchers may achieve inaccurate results. We show that running stochastic  
492 maps on a single tree does not fully capture all the possible biogeographic histories of a

493 clade, and thus strongly encourage researchers to use this method in combination with a  
494 sample of trees to take advantage of its full potential.

495         Additionally, it seems that using several trees reduces the differences between  
496 different biogeographic models (e.g. DIVA-like and its + J variant). We find that  
497 lineages through time by area and inferred ages of dispersal are more similar among  
498 models when phylogenetic uncertainty is taken into account (Figs 3c, d, 4c, d, 7c, d).  
499 Thus, at least in some cases, phylogenetic uncertainty might be more influential than  
500 uncertainty in the choice of a particular biogeographic model.

501         On a lighter note, our results suggest that phylogenetic uncertainty is not crucial  
502 for model selection. We show that the outcome of model selection (DEC, DIVA-like,  
503 BAYAREA-like, and their +J variants) is the same regardless if the comparison is done  
504 using the MCC tree or 100 posterior trees (Online Supplementary figure S12). Thus, it  
505 seems that model selection can be done using the MCC tree, and biogeographic  
506 stochastic maps can be run on a sample of posterior trees using only the preferred  
507 model.

508         **Cladogenetic events, founder-event speciation, and uncertainty.** We find that  
509 bias in age estimates is stronger for cladogenetic events (relative to anagenetic events)  
510 when a single tree is used. Models including founder-event speciation  
511 disproportionately favor cladogenetic events (Ree & Sanmartín 2018), and thus are  
512 more prone to overconfidence, especially when inferring ages of biogeographic events.  
513 Such models have been introduced by Matzke (2013b, 2014) as a way to model the  
514 possibility of dispersal to a new area being followed by speciation over the course of  
515 very few generations—almost instantaneously in an evolutionary timescale. In practice,  
516 this parameter allows dispersal to happen simultaneously with cladogenetic events, i.e.

517 at tree nodes. This is opposed to anagenetic dispersal, which happens along the  
518 branches. Stochastic maps resolve the age of an anagenetic dispersal at any point of  
519 such a branch, but founder-event dispersal is always tied to the age of a particular node.  
520 Because of this, ages of events inferred from models including founder-event speciation  
521 are more biased and closely tied to the ages of nodes when a single tree is used to run  
522 the stochastic maps (Figs 3a, 4a, 7a). This overconfidence is partly smoothed by the  
523 variability in ages that can be incorporated by using a sample of posterior trees (Figs 3c,  
524 d, 4c, d, 7c, d). Thus, we recommend incorporating phylogenetic uncertainty when  
525 running stochastic maps especially when using models including founder event-  
526 speciation. It is especially important to have this in mind since model selection often  
527 favors such models (Matzke 2014, Ree & Sanmartín 2018, Matzke 2021). It should also  
528 be noted, however, that even models favoring anagenetic dispersal also suffer from bias  
529 when using a single tree: they are bound to a given time interval, as opposed to the  
530 wider range of possible time intervals when several trees are used.

531 **Lineages through time by area.** We here explore the concept of “lineages  
532 through time by area” plots. These were initially conceived by Ceccarelli et al. (2019),  
533 who were interested in tracking changes in diversity of two different areas through time.  
534 By dividing the tree into user-defined time slices, it is possible to count the number of  
535 lineages occupying each area in each time period. Diversity increases through time as a  
536 combination of in-situ speciation and new dispersals into the area. Additionally,  
537 diversity can also decrease if the model infers extinctions in a particular area  
538 (Supplementary Figure S13), or if the taxon sampling includes fossil tips (ILFM,  
539 unpublished data).

540 These plots may be used as rough approximations to detect areas which might be  
541 under special processes. For instance, our data on sand spiders indicate that the Caatinga

542 rapidly accumulated diversity after the initial dispersal to this area (Fig. 3), which is  
543 consistent with observations that this is one of the most diverse dry forests in the  
544 Neotropical region (DRYFLOR 2016). Nevertheless, it should be noted that these plots  
545 present limitations. It is known that DEC and its variants vastly and consistently  
546 underestimate extinctions (Ree & Smith 2008). Known but unsampled species are  
547 effectively “extinct” for the purposes of the model and will not be considered, which  
548 may affect the results of the plot, particularly if the sampling is uneven across areas.  
549 This is clear when we take a look at the diversification of lineages from Africa: only  
550 four in-situ speciation events are inferred (Fig. 3, Table 2), even though the genus  
551 *Hexophthalma* currently includes 8 species (Lotz 2018). It is clear that diversification in  
552 this area is underestimated by our sampling, which only includes three species. Thus,  
553 we recommend that such plots are only considered when the sampling of the group is  
554 complete, or at least when the unsampled species are not biased to a particular area.  
555 Second, even if the sampling is complete, these plots will not account for truly extinct  
556 species. Researchers interested in comparing diversification rates among areas, while  
557 accounting for extinct lineages, should refer to methods specifically designed for  
558 modelling this (e.g. BAMM; Rabosky 2014).

559         **Sand spiders dispersed to Galapagos paleo-islands.** The Galapagos Islands  
560 are volcanic in origin, and while the oldest emerged island is 3–4 million years old  
561 (White et al. 1993), there is evidence of drowned paleo-islands to the east (Christie et al.  
562 1992) and north (Werner et al. 1999) of the current archipelago. The particular biota of  
563 the islands has affinities with those of South America, the Greater Antilles and other  
564 Pacific islands (Grehan 2001, Heads & Grehan, in press). It is clear that the only sand  
565 spider of the islands, *S. utriiformis*, is of South American origins, as its closest relative  
566 lives in the coast of Peru (Fig. 2). The estimated age of split of these two species (1.2–

567 22 Myr, 95% highest posterior density interval, median 9.7) exceeds the age of the  
568 oldest emerged islands. Accordingly, a biogeographic model allowing for dispersal to  
569 the islands in the last 15 Myr is strongly favored in a relation to a model allowing  
570 dispersal only in the last 3.5 Myr (Fig. 6). In most trees the *S. utriformis*–*S. peruensis*  
571 split is older than 3.5 Myr; thus the second scenario requires that *S. utriformis* had  
572 originated in coastal Peru through in-situ speciation before 3.5 Myr, dispersed to the  
573 islands after their formation, and then went extinct in the continent (Online  
574 Supplementary Figure S13). In contrast, the first scenario only requires one dispersal  
575 event from the ancestor of the pair of species to the islands, followed by a (costless)  
576 vicariant event. Thus, our data fit better a model in which *Sicarius* reached the  
577 Galapagos when the archipelago was formed by currently drowned paleo-islands.

578         Interestingly, the oldest paleo-island reported by Christie et al. (1992) is only  
579 ~530 km distant from the continent, while the current islands lie at ~940 km away from  
580 the continent. Thus, the paleo-islands were closer to the continent, which could help  
581 explaining how a group with poor dispersal capabilities reached a volcanic archipelago.  
582 This scenario is similar to the metapopulation vicariance model that has been proposed  
583 to explain the presence of ancient, poorly dispersing groups in recent volcanic  
584 archipelagos, particularly in the Galapagos (Heads 2018, Heads & Grehan, in press). It  
585 could also explain other instances of clades whose estimated ages are older than the  
586 islands they live in, such as sheet-web weavers in the Juan Fernández Islands (Arnedo  
587 & Hormiga, in press).

588         Is it possible that there were even older paleo-islands in the Galapagos? Christie  
589 et al. (1992) suggested that it is very possible that the history of the archipelago could  
590 be as old as that of the volcanic hotspot, spanning 80–90 million years, and thus other  
591 uncharted paleo-islands might exist. Further evidence for this hypothesis has been

592 recently reviewed by Heads & Grehan (in press). To account for this possibility, we  
593 compared a model where dispersal to the Galapagos was only possible in last 15 Myr to  
594 an unconstrained model where dispersal could happen at any moment—thus,  
595 considering the possibility of even older paleo-islands. The data never provides definite  
596 support to the 15-Myr model, and in those trees where the split between *S. utriformis*  
597 and *S. peruensis* is older than 15 Myr, it strongly supports the unconstrained model (Fig.  
598 5). In addition, the inferred age of dispersal to Galapagos in the unconstrained model  
599 has some probability of being older than 15 Myr (Fig. 4). Thus, our data is unable to  
600 reject dispersal to the Galapagos before the age of the oldest recorded paleo-islands.  
601 This is in line with the opinion that the archipelago must be very old and uncharted  
602 paleo-islands exist (Christie et al. 1992).

603         Interestingly, we found a correlation between the support of alternative models  
604 and the ages of split (Fig. 5). There is a positive correlation between age of split and  
605 AIC weight of the unconstrained model, stronger in the models without founder-event  
606 speciation (DEC,  $r = 0.86$ ; DIVA-like,  $r = 0.83$ ; DIVA-like + J,  $r = 0.63$ , BAYAREA-  
607 like + j,  $r = 0.50$ ). This is probably because these models favor anagenetic events, and  
608 thus the amount of time passed is correlated with opportunity for dispersal. This means  
609 that even if the split is younger than 15 Myr, but very close to the limit between time  
610 slices, the window of opportunity for a dispersal is very narrow, and thus even in these  
611 cases the unconstrained model is favored.

612 **Ancient connections among Neotropical dry forests.** Our data indicates that the  
613 Caatinga clade reached this area as a result of a single dispersal. Such dispersal most  
614 likely originated from northern dry forests in the Caribbean and Mesoamerica, or from  
615 Andean dry forests. Interestingly, this second possibility only appears as a likely  
616 candidate when topological uncertainty is taken into account (Table 1). Such

617 connections seem to support the hypothesis by Pennington et al. (2000) that some areas  
618 of present-day Amazonia have been replaced by xeric vegetation in the past. They  
619 compiled detailed evidence that compellingly indicates dry conditions in the region  
620 during the Quaternary. Phylogenetic patterns of other organisms, such as birds, support  
621 the hypothesis of recent connections among Neotropical dry forests (e.g. Corbett et al.  
622 2020). Our data, on the other hand, indicates that dispersal of sand spiders to the  
623 Caatinga happened as early as in the Oligocene (Fig. 7), with no recent dispersals to  
624 other areas. Other groups of organisms display similarly ancient histories in this biome  
625 (e.g. geckos; Werneck et al. 2012). Thus, it is not unlikely that currently disjunct  
626 Neotropical dry areas might have gone through many periods of connections over the  
627 last 30 million years, and that groups with different dispersing capabilities could have  
628 responded idiosyncratically to such connections.

629 **Script availability.** The script for replicating the analyses is available as Supplementary  
630 Material S1, or from GitHub ([https://github.com/ivanlfm/BGB\\_BSM\\_multiple\\_trees](https://github.com/ivanlfm/BGB_BSM_multiple_trees)).  
631 The code is thoroughly commented and documented, with explanations for each of the  
632 options. It has been successfully tested with two additional datasets, one of them  
633 including fossil tips, and thus we expect it to be easily adaptable to other researchers'  
634 needs. These datasets varied between ~30 and ~100 taxa, ~10 areas (with maximum  
635 range size set to ~3) and runs included 2–3 free parameters. In each case, analyses run  
636 over 100 posterior trees were usually completed between 8 and 12 hours on a standard  
637 personal computer (Intel® i5-5200U 2.20 GHz with 4 GB of RAM). Thus, we expect  
638 that the analyses outlined above are not too demanding computationally.

639 **Concluding remarks.** (1) Inferences of transitions among areas and age of  
640 biogeographic events using biogeographic stochastic maps benefit from running the  
641 analysis over a sample of trees, instead of a single, target tree, since they incorporate

642 uncertainty in topology and age estimates that might be relevant to the questions at  
643 hand. We provide a broadly customizable R script to run such analyses.

644 (2) Including phylogenetic uncertainty is especially important in models including a  
645 founder-event speciation parameter; ages of biogeographic events estimated under these  
646 models are tightly tied to cladogenetic events, such that using a single tree results in  
647 overconfident estimates that disregard the uncertainty in age estimates present in trees  
648 from the posterior distribution.

649 (3) Our data strongly suggests *Sicarius* most likely dispersed to the Galapagos Islands  
650 before the formation of the oldest emerged island. This is congruent with geological  
651 findings that indicate that seamounts along the volcanic hotspot are former paleo-islands  
652 of the archipelago that are now drowned.

653 (4) Our data indicate *Sicarius* dispersed into the Caatinga around 30 Mya, suggesting an  
654 ancient colonization of this area. The route of dispersal is unclear due to topological  
655 uncertainty, but most likely consisted of a northern route connecting the Caatinga to the  
656 Caribbean and Mesoamerican dry forests, or of a southern route connecting the  
657 Caatinga to the Andean dry forests.

658

## 659 **Funding**

660 This work was supported by a CONICET post-doctoral fellowship to ILFM, a PICT-  
661 2015-0283 grant from ANPCyT to MJR, and FAPEMIG (PPM-00605-17), CNPq  
662 (405795/2016-5; 307731/2018-9), and Instituto Nacional de Ciência e Tecnologia dos  
663 Hymenoptera Parasitóides da Região Sudeste Brasileira (<http://www.hympar.ufscar.br>,  
664 CNPq 465562/2014-0, FAPESP 2014/50940-2) to AJS.

665

## 666 **Acknowledgments**

667 We thank N. Matzke for his diligence and support to the BioGeoBEARS community  
668 through the online forums. Earlier versions of the text benefited from a critical revision  
669 by U. Oliveira.

670

## 671 **References**

- 672 Akaike H. 1973. Information theory and an extension of the maximum likelihood principle. In B. N.  
673 Petrov & F. Caski (Eds.), Proceedings of the Second International Symposium on Information Theory  
674 (pp. 267-281). Budapest: Akademiai Kiado.
- 675 Arnedo M.A., Hormiga G. In press. Repeated colonization, adaptive radiation and convergent evolution  
676 in the sheet-weaving spiders (Linyphiidae) of the south Pacific Archipelago of Juan Fernandez.  
677 Cladistics.
- 678 Baker C.M., Boyer S.L., Giribet G. 2020. A well-resolved transcriptomic phylogeny of the mite  
679 harvestman family Pettalidae (Arachnida, Opiliones, Cyphophthalmi) reveals signatures of Gondwanan  
680 vicariance. *J. Biogeogr.* 47: 1345–1361.
- 681 Ballesteros J.A., Sharma P.P. 2019. A critical appraisal of the placement of Xiphosura (Chelicerata) with  
682 account of known sources of phylogenetic error. *Syst. Biol.* 68:896–917.
- 683 Binford G.J., Callahan M.S., Bodner M.R., Rynerson M.R., Núñez P.B., Ellison C.E., Duncan R.P. 2008.  
684 Phylogenetic relationships of *Loxosceles* and *Sicarius* spiders are consistent with Western Gondwanan  
685 vicariance. *Mol. Phylogenet. Evol.* 49:538–53.
- 686 Bremer K. 1992. Ancestral areas: A cladistic reinterpretation of the center of origin concept. *Syst. Biol.*  
687 41:436–445.
- 688 Bromham L. 2019. Six impossible things before breakfast: assumptions, models, and belief in molecular  
689 dating. *Trends Ecol. Evol.* 34:474–486.
- 690 Cala-Riquelme F., Gutiérrez-Estrada M., Florez-Daza A.E., Agnarsson I. 2017. A new six-eyed sand  
691 spider *Sicarius* Walckenaer, 1847 (Araneae: Haplogynae: Sicariidae) from Colombia, with information  
692 on its natural history. *Arachnology.* 17:176–182.
- 693 Ceccarelli F.S., Koch N.M., Soto E.M., Barone M.L., Arnedo M.A., Ramírez M.J. 2019. The grass was  
694 greener: repeated evolution of specialized morphologies and habitat shifts in ghost spiders following  
695 grassland expansion in South America. *Syst. Biol.* 68:63–77.
- 696 Christie D.M., Duncan R.A., McBirney A.R., Richards M.A., White W.M., Harpp K.S., Fox C.G. 1992.  
697 Drowned islands downstream from the Galapagos hotspot imply extended speciation times. *Nature.*  
698 355:246–248.

- 699 Corbett E.C., Bravo G.A., Schunck F., Naka L.N., Silveira L.F., Edwards S. V. 2020. Evidence for the  
700 Pleistocene Arc Hypothesis from genome-wide SNPs in a Neotropical dry forest specialist, the Rufous-  
701 fronted Thornbird (Furnariidae: *Phacellodomus rufifrons*). Mol. Ecol. 29:4457–4472.
- 702 Drummond A.J., Ho S.Y.W., Phillips M.J., Rambaut A. 2006. Relaxed phylogenetics and dating with  
703 confidence. PLoS Biol. 4:699–710.
- 704 DRYFLOR. 2016. Plant diversity patterns in neotropical dry forests and their conservation implications.  
705 Science 353:1383–1388.
- 706 Dupin J., Matzke N.J., Särkinen T., Knapp S., Olmstead R.G., Bohs L., Smith S.D. 2017. Bayesian  
707 estimation of the global biogeographical history of the Solanaceae. J. Biogeogr. 44:887–899.
- 708 Echeverría-Londoño S., Enquist B.J., Neves D.M., Violle C., Boyle B., Kraft N.J.B., Maitner B.S.,  
709 McGill B., Peet R.K., Sandel B., Smith S.A., Svenning J.-C., Wisser S.K., Kerckhoff A.J. 2018. Plant  
710 functional diversity and the biogeography of biomes in North and South America. Front. Ecol. Evol. 6:1–  
711 12.
- 712 Grehan J. 2001. Biogeography and evolution of the Galapagos: integration of the biological and  
713 geological evidence. Biol. J. Linn. Soc. 74:267–287.
- 714 Heads M. 2018. Metapopulation vicariance explains old endemics on young volcanic islands. Cladistics.  
715 34:292–311.
- 716 Heads M., Grehan J.R. In press. The Galápagos Islands: biogeographic patterns and geology. Biol. Rev.
- 717 Ho, SYW, Duchêne S. 2014. Molecular-clock methods for estimating evolutionary rates and timescales.  
718 Mol. Ecol. 23: 5947–5965.
- 719 Hortal J., De Bello F., Diniz-Filho J.A.F., Lewinsohn T.M., Lobo J.M., Ladle R.J. 2015. Seven Shortfalls  
720 that Beset Large-Scale Knowledge of Biodiversity. Annu. Rev. Ecol. Evol. Syst. 46:523–549.
- 721 Huelsenbeck J.P., Rannala B., Masly J.P. 2000. Accommodating phylogenetic uncertainty in evolutionary  
722 studies. Science 288:2349–2350.
- 723 Huelsenbeck J.P., Imenov N.S. 2002. Geographic origin of human mitochondrial DNA:  
724 Accommodating phylogenetic uncertainty and model comparison. Syst. Biol. 51:155–165.
- 725 Lotz L.N. 2018. An update on the spider genus *Hexophthalma* (Araneae: Sicariidae) in the Afrotropical  
726 region, with descriptions of new species. Eur. J. Taxon. 2018:475–494.
- 727 Lüdecke D. 2018. sjmisc: data and variable transformation functions. J. Open Source Softw. 3: 754.
- 728 Magalhaes I.L.F., Oliveira U., Santos F.R., Vidigal T.H.D.A., Brescovit A.D., Santos A.J. 2014. Strong  
729 spatial structure, Pliocene diversification and cryptic diversity in the Neotropical dry forest spider  
730 *Sicarius cariri*. Mol. Ecol. 23:5323–5336.
- 731 Magalhaes I.L.F., Brescovit A.D., Santos A.J. 2017. Phylogeny of Sicariidae spiders (Araneae:  
732 Haplogynae), with a monograph on Neotropical *Sicarius*. Zool. J. Linn. Soc. 179:767–864.
- 733 Magalhaes I.L.F., Neves D.M., Santos F.R., Vidigal T.H.D.A., Brescovit A.D., Santos A.J. 2019.  
734 Phylogeny of Neotropical *Sicarius* sand spiders suggests frequent transitions from deserts to dry forests  
735 despite antique, broad-scale niche conservatism. Mol. Phylogenet. Evol. 140:106569.
- 736 Matzke NJ. 2013a. BioGeoBEARS: BioGeography with Bayesian (and likelihood) evolutionary analysis  
737 in R Scripts. Available from: <https://github.com/nmatzke/BioGeoBEARS> (last accessed October 13,  
738 2020).

- 739 Matzke N.J. 2013b. Probabilistic historical biogeography: new models for founder-event speciation,  
740 imperfect detection, and fossils allow improved accuracy and model-testing. *Front. Biogeogr.* 5.
- 741 Matzke N.J. 2014. Model selection in historical biogeography reveals that founder-event speciation is a  
742 crucial process in island clades. *Syst. Biol.* 63:951–970.
- 743 Matzke N.J. 2021. Statistical comparison of DEC and DEC+J is identical to comparison of two ClaSSE  
744 submodels, and is therefore valid. OSF Preprint, April 27.1–40.
- 745 Nash J.C. 2014. On best practice optimization methods in R. *J. Stat. Softw.* 60:1–14.
- 746 Nylander J.A.A., Olsson U., Alström P., Sanmartín I. 2008. Accounting for phylogenetic uncertainty in  
747 biogeography: a Bayesian approach to dispersal-vicariance analysis of the thrushes Aves: *Turdus*). *Syst.*  
748 *Biol.* 57: 257–268.
- 749 Paradis E, Schliep K. 2019. ape 5.0: an environment for modern phylogenetics and evolutionary analyses  
750 in R. *Bioinformatics* 35: 526–528.
- 751 Parham J.F., Donoghue P.C.J., Bell C.J., Calway T.D., Head J.J., Holroyd P.A., Inoue J.G., Irmis R.B.,  
752 Joyce W.G., Ksepka D.T., Patané J.S.L., Smith N.D., Tarver J.E., Van Tuinen M., Yang Z., Angielczyk  
753 K.D., Greenwood J.M., Hipsley C.A., Jacobs L., Makovicky P.J., Müller J., Smith K.T., Theodor J.M.,  
754 Warnock R.C.M., Benton M.J. 2012. Best practices for justifying fossil calibrations. *Syst. Biol.* 61:346–  
755 359.
- 756 Pennington R.T., Prado D.E., Pendry C. a. 2000. Neotropical seasonally dry forests and Quaternary  
757 vegetation changes. *J. Biogeogr.* 27:261–273.
- 758 Prado D.E., Gibbs P.E. 1993. Patterns of species distributions in the dry seasonal forests of South  
759 America. *Ann. Missouri Bot. Gard.* 80:902–927.
- 760 R Core Team (2020). *R: A language and environment for statistical computing*. R Foundation for  
761 *Statistical Computing*, Vienna, Austria.
- 762 Rabosky D.L. 2014. Automatic detection of key innovations, rate shifts, and diversity-dependence on  
763 phylogenetic trees. *PLoS One.* 9: e89543.
- 764 Ree R.H., Sanmartín I. 2018. Conceptual and statistical problems with the DEC+J model of founder-  
765 event speciation and its comparison with DEC via model selection. *J. Biogeogr.* 45:741–749.
- 766 Ree R.H., Smith S.A. 2008. Maximum likelihood inference of geographic range evolution by dispersal,  
767 local extinction, and cladogenesis. *Syst. Biol.* 57:4–14.
- 768 Ree R.H., Moore B.R., Webb C.O., Donoghue M.J. 2005. A likelihood framework for inferring the  
769 evolution of geographic range on phylogenetic trees. *Evolution.* 59:2299–2311.
- 770 Renner S.S. 2016. Available data point to a 4-km-high Tibetan Plateau by 40 Ma, but 100 molecular-  
771 clock papers have linked supposed recent uplift to young node ages. *J. Biogeogr.* 43:1479–1487.
- 772 Revell L.J. 2012. phytools: an R package for phylogenetic comparative biology (and other things).  
773 *Methods in Ecol. Evol.* 3: 217–223.
- 774 Ronquist F. 1997. Dispersal-vicariance analysis: A new approach to the quantification of historical  
775 biogeography. *Syst. Biol.* 46:195–203.
- 776 Santaquiteria A., Siqueira A.C., Duarte-Ribeiro E., Carnevale G., White W., Pogonoski J., Baldwin C.C.,  
777 Ortí G., Arcila D., Betancur-R. R. In press. Phylogenomics and historical biogeography of seahorses,

- 778 dragonets, goatfishes, and allies (Teleostei: Syngnatharia): assessing the factors driving uncertainty in  
779 biogeographic inferences. *Syst. Biol.*
- 780 Suh A. 2016. The phylogenomic forest of bird trees contains a hard polytomy at the root of Neoaves.  
781 *Zool. Scr.* 45:50–62.
- 782 Wagenmakers E.J., Farrell S. 2004. AIC model selection using Akaike weights. *Psychon. Bull. Rev.*  
783 11:192–196.
- 784 Warnock R.C.M., Parham J.F., Donoghue P.C.J., Joyce W.G., Lyson T.R. 2015. Calibration uncertainty  
785 in molecular dating analyses: there is no substitute for the prior evaluation of time priors. *Proc. R. Soc. B*  
786 *Biol. Sci.* 282:20141013.
- 787 Werneck F.P., Gamble T., Colli G.R., Rodrigues M.T., Sites J.W. 2012. Deep diversification and long-  
788 term persistence in the south american “dry diagonal”: integrating continent-wide phylogeography and  
789 distribution modeling of geckos. *Evolution* 66:3014–3034.
- 790 Werner R., Hoernle K., Van Den Bogaard P., Ranero C., Von Huene R., Korich D. 1999. Drowned 14-  
791 m.y.-old Galapagos archipelago off the coast of Costa Rica: Implications for tectonic and evolutionary  
792 models. *Geology*. 27:499–502.
- 793 White W.M., McBirney A.R., Duncan R.A. 1993. Petrology and geochemistry of the Galápagos Islands:  
794 portrait of a pathological mantle plume. *J. Geophys. Res.* 98:533–563.
- 795 Yu Y., Harris A.J., He X. 2010. S-DIVA (Statistical Dispersal-Vicariance Analysis): a tool for inferring  
796 biogeographic histories. *Mol. Phylogenet. Evol.* 56:848–850.
- 797 Yu Y., Harris A.J., Blair C., He X. 2015. RASP (Reconstruct Ancestral State in Phylogenies): a tool for  
798 historical biogeography. *Mol. Phylogenet. Evol.* 87:46–49.

799

## 800 **Data Availability Statement**

801 All the data and scripts used in our analyses is available as Online Supplementary

802 Material:

803 **Supplementary File S1.** R script for running and summarizing ancestral range

804 estimates and biogeographic stochastic maps in a sample of trees. Updated versions can

805 be found in [https://github.com/ivanlfm/BGB\\_BSM\\_multiple\\_trees](https://github.com/ivanlfm/BGB_BSM_multiple_trees).

806 **Supplementary File S2.** Maximum clade credibility phylogenetic tree representing

807 relationships among *Sicarius* and *Hexophthalma* from the analysis of Magalhaes et al.

808 (2019).

809 **Supplementary File S3.** 27000 trees from the posterior distribution from the analysis of  
810 Magalhaes et al. (2019).

811 **Supplementary File S4.** Phylip-formatted file with distribution ranges of *Sicarius* and  
812 *Hexophthalma*.

813 **Supplementary File S5.** R script for performing biogeographic model selection in our  
814 dataset.

815 **Supplementary Files S6–S8.** Inputs for performing the time-stratified analysis in  
816 BioGeoBEARS allowing occupation of Galapagos only in the last 15 Myr or 3.5 Myr.

817 **Supplementary Files S9–S12.** Supplementary table (S9) and figures (S10–S13).

818

## 819 **Figures**

820 **Figure 1.** Biogeographic stochastic maps are insufficient for fully accounting for  
821 uncertainty in ancestral range estimates. Each column represents a single tree from the  
822 posterior distribution of the Bayesian analysis of our dataset, with the most likely  
823 estimated states in the top row, and different stochastic maps in the bottom rows. While  
824 estimates in each stochastic map are different, the most remarkable differences are  
825 found among trees with different topologies. Note the tip marked with a grey star,  
826 which is a rogue taxon (*Sicarius andinus*). As it shifts its position across the different  
827 trees of the stationary phase of the chain, it leads to substantially different ancestral  
828 range estimates in each tree.

829 **Figure 2.** Map depicting the areas inhabited by *Sicarius* and *Hexophthalma*, and the  
830 ancestral range estimates under DIVA-like using the maximum clade credibility tree.  
831 Solid arrows among areas represent one dispersal event between areas that is robust to

832 topological and biogeographical uncertainty. Dashed lines represent inferred dispersal  
833 events that are sensitive to uncertainty; arrow widths are proportional to the frequency  
834 at which such dispersals are inferred. Numbered circles indicate the inferred number of  
835 within-area speciation in each of the areas. Area abbreviations: B = dry forests in the  
836 Caribbean coast of Colombia; F = southern Africa deserts and xeric scrublands; C =  
837 Chiquitano dry forests in Bolivia; D = Andean dry forests; G = Galapagos Islands; I =  
838 Caatinga dry forest in Brazil; M = Mesoamerican dry forests; O = Argentinean Monte;  
839 S = Sechura desert in the Peruvian coast; T = Atacama Desert and neighboring Chilean  
840 xeric scrublands. Africa not to scale.

841 **Figure 3.** Number of lineages occupying each area through time. Solid lines are the  
842 average of 100 biogeographic stochastic maps, and dashed lines are the 95% confidence  
843 interval. See Fig. 2 for area abbreviations. The dashed vertical line indicates the  
844 boundary between time slices in the time-stratified analysis. Runs on a single maximum  
845 clade credibility tree (a, b) show abrupt changes in the number of lineages that are  
846 related to cladogenetic events, whose age does not vary because there is no uncertainty  
847 associated to the tree. This effect is more pronounced in the model with founder-event  
848 speciation (a) because it relies more on cladogenetic events for estimating ancestral  
849 ranges. Using several trees (each with 100 stochastic maps) to account for topological  
850 and age uncertainty removes this effect and smooths the curves (c, d), reducing  
851 differences between models with and without founder-event speciation.

852 **Figure 4.** Histograms with the inferred age of dispersal of *Sicarius* to the Galapagos  
853 Islands. Analyses based on a maximum clade credibility tree (MCC tree) (a, b) produce  
854 sharper estimates that are closely tied to the age of split of *Sicarius utrififormis* (from  
855 Galapagos) and its sister species. This effect is especially pronounced in the model  
856 including founder-event speciation (a), where 88% of the estimates have exactly the

857 same age of that split. Accounting for uncertainty in topology and age estimates (c, d)  
858 reveals that the age of dispersal is much more uncertain. The dashed vertical line  
859 indicates the boundary between time slices in the time-stratified analysis and  
860 corresponds to the geological evidence of the oldest drowned paleo-islands of the  
861 Galapagos archipelago.

862 **Figure 5.** Relationship between AIC weight of the unconstrained biogeographic model  
863 allowing for dispersal of the Galapagos at any time (relative to the time-stratified model  
864 allowing dispersal only during the last 15 Myr) and the age of split of *Sicarius*  
865 *utriformis* (from Galapagos) and its sister species. Each dot represents an individual tree  
866 of a sample of 100 taken from the posterior distribution of a Bayesian analysis; the star  
867 represents the maximum clade credibility tree. Values of AIC weight close to 1 (darker  
868 shades) indicate strong support for the unconstrained model, while values close to 0  
869 (lighter shades) indicate strong support for the time-stratified model. The light grey  
870 areas at the top and bottom of the graphs are the zones where the support for one of the  
871 alternative models is decisive. The dashed vertical line indicates the boundary between  
872 time slices in the time-stratified analysis. Numbers at the top and bottom of the graph  
873 are the number of trees supporting each model, and the median support relative to the  
874 alternative model. Trees in which the split between *S. utriformis* and its sister species  
875 are older than 15 Myr fit better to an unconstrained scenario allowing occupation of the  
876 Galapagos before that time.

877 **Figure 6.** Relationship between AIC weight of the time-stratified biogeographic model  
878 allowing dispersal only during the last 15 Myr (relative to the time-stratified model  
879 allowing dispersal only during the last 3.5 Myr) and the age of split of *Sicarius*  
880 *utriformis* (from Galapagos) and its sister species. Each dot represents an individual tree  
881 of a sample of 100 taken from the posterior distribution of a Bayesian analysis; the star

882 represents the maximum clade credibility tree. Values of AIC weight close to 1 (darker  
883 shades) indicate strong support for the 15 Myr model, while values close to 0 (lighter  
884 shades) indicate strong support for the 3.5 Myr model. The light grey areas at the top and  
885 bottom of the graphs are the zones where the support for one of the alternative models is  
886 decisive. The dashed vertical lines indicate the boundary between time slices in each of  
887 the time-stratified models. Numbers at the top and bottom of the graph are the number  
888 of trees supporting each model, and the median support relative to the alternative model.  
889 With few exceptions, most trees fit decisively better to a model allowing for dispersal in  
890 the last 15 Myr, regardless of the age of the split.

891 **Figure 7.** Histograms with the inferred age of dispersal of *Sicarius* to the Caatinga.  
892 Analyses based on a maximum clade credibility tree (MCC tree) (a, b) produce sharper  
893 estimates closely tied to the ages of cladogenetic events in this tree. This is especially  
894 notable in the model including founder-event speciation (a), which displays four peaks,  
895 each associated with the age of the four successive nodes in the tree that could have  
896 originated the founder-event dispersal to the Caatinga. Accounting for uncertainty in  
897 topology and age estimates (c, d) reveals that the age of dispersal is much more  
898 uncertain.

**Table 1.** Geographic range of origin of clades dispersing into the Caatinga and their relative frequencies (in %) in different biogeographic stochastic maps. Taking topological uncertainty into account (by running stochastic maps in 100 posterior trees) increases the percentage of inferences of dispersal coming from Andean or Chiquitano dry forests (values marked in bold) while decreasing the probability of dispersal coming from Mesoamerican or Caribbean dry forests, or the Atacama desert (values marked in italics).

| Source trees (each with 100 BSM) | Biogeographic model | Caribbean (B) | Chiquitano (C) | Andes (D)   | Mesoamerica (M) | Monte (O)   | Atacama (T) | Caribbean+Andes | Andes+Mesoamerica | Caribbean+Mesoamerica | Caribbean+Monte | Andes+Monte | Monte+Mesoamerica |
|----------------------------------|---------------------|---------------|----------------|-------------|-----------------|-------------|-------------|-----------------|-------------------|-----------------------|-----------------|-------------|-------------------|
| MCCT                             | DVL+J               | 25            | 0              | 13          | 30              | 15          | 15          | 0               | 0                 | 2                     | 0               | 0           | 0                 |
| MCCT                             | DVL                 | 22            | 0              | 9           | 19              | 19          | 19          | 0               | 1                 | 2                     | 2               | 4           | 3                 |
| 100 trees                        | DVL+J               | 22            | <b>2</b>       | <b>24</b>   | 22              | <b>16</b>   | <i>11</i>   | 0               | 0                 | 2                     | 0               | 0           | 0                 |
| 100 trees                        | DVL                 | <i>16.2</i>   | <b>1.2</b>     | <b>26.6</b> | <i>15.3</i>     | <i>12.5</i> | <i>15.5</i> | <b>1.3</b>      | 1.3               | 2.7                   | 1.9             | <i>1.7</i>  | 2                 |

**Table 2.** List of the most common biogeographic events inferred under DIVA-like, averaged over 100 trees from the posterior distribution.

| Starting range | Ending range | Average events | Event type         |
|----------------|--------------|----------------|--------------------|
| I              | I            | 10.0948        | In-situ speciation |
| T              | T            | 7.5704         | In-situ speciation |
| F              | F            | 3.9997         | In-situ speciation |
| S              | S            | 2.5332         | In-situ speciation |
| O              | O            | 2.168          | In-situ speciation |
| D              | D            | 1.6566         | In-situ speciation |
| T              | TS           | 1.0111         | Dispersal          |
| MB             | M            | 0.9475         | Vicariance         |
| MB             | B            | 0.9475         | Vicariance         |
| D              | DC           | 0.8726         | Dispersal          |
| SG             | S            | 0.8004         | Vicariance         |
| SG             | G            | 0.8004         | Vicariance         |
| S              | SG           | 0.7997         | Dispersal          |
| OT             | O            | 0.6377         | Vicariance         |
| OT             | T            | 0.636          | Vicariance         |
| TS             | S            | 0.5241         | Vicariance         |
| TS             | T            | 0.5228         | Vicariance         |



**Figure 1.** Biogeographic stochastic maps are insufficient for fully accounting for uncertainty in ancestral range estimates. Each column represents a single tree from the posterior distribution of the Bayesian analysis of our dataset, with the most likely estimated states in the top row, and different stochastic maps in the bottom rows. While estimates in each stochastic map are different, the most remarkable differences are found among trees with different topologies. Note the tip marked with a grey star, which is a rogue taxon (*Sicarius andinus*). As it shifts its position across the different trees of the stationary phase of the chain, it leads to substantially different ancestral range estimates in each tree.



**Figure 2.** Map depicting the areas inhabited by *Sicarius* and *Hexophthalma*, and the ancestral range estimates under DIVA-like using the maximum clade credibility tree. Solid arrows among areas represent one dispersal event that is robust to topological and biogeographical uncertainty. Dashed lines represent inferred dispersal events that are sensitive to uncertainty; arrow widths are proportional to the frequency at which such dispersals are inferred. Numbered circles indicate the inferred number of within-area speciation in each of the areas. Area abbreviations: B = dry forests in the Caribbean coast of Colombia; F = southern Africa deserts and xeric scrublands; C = Chiquitano dry forests in Bolivia; D = Andean dry forests; G = Galapagos Islands; I = Caatinga dry forest in Brazil; M = Mesoamerican dry forests; O = Argentinean Monte; S = Sechura desert in the Peruvian coast; T = Atacama Desert and neighboring Chilean xeric scrublands. Africa not to scale.



**Figure 3.** Number of lineages occupying each area through time. Solid lines are the average of 100 biogeographic stochastic maps, and dashed lines are the 95% confidence interval. See Fig. 2 for area abbreviations. The dashed vertical line indicates the boundary between time slices in the time-stratified analysis. Runs on a single maximum clade credibility tree (a, b) show abrupt changes in the number of lineages that are related to cladogenetic events, whose age does not vary because there is no uncertainty associated to the tree. This effect is more pronounced in the model with founder-event speciation (a) because it relies more on cladogenetic events for estimating ancestral ranges. Using several trees (each with 100 stochastic maps) to account for topological and age uncertainty removes this effect and smooths the curves (c, d), reducing differences between models with and without founder-event speciation.



**Figure 4.** Histograms with the inferred age of dispersal of *Sicarius* to the Galapagos Islands. Analyses based on a maximum clade credibility tree (MCC tree) (a, b) produce sharper estimates that are closely tied to the age of split of *Sicarius utriformis* (from Galapagos) and its sister species. This effect is especially pronounced in the model including founder-event speciation (a), where 88% of the estimates have exactly the same age of that split. Accounting for uncertainty in topology and age estimates (c, d) reveals that the age of dispersal is much more uncertain. The dashed vertical line indicates the boundary between time slices in the time-stratified analysis and corresponds to the geological evidence of the oldest drowned paleoislands of the Galapagos archipelago.



**Figure 5.** Relationship between AIC weight of the unconstrained biogeographic model allowing for dispersal of the Galapagos at any time (relative to the time-stratified model allowing dispersal only during the last 15 Myr) and the age of split of *Sicarius utriformis* (from Galapagos) and its sister species. Each dot represents an individual tree of a sample of 100 taken from the posterior distribution of a Bayesian analysis; the star represents the maximum clade credibility tree. Values of AIC weight close to 1 (darker shades) indicate strong support for the unconstrained model, while values close to 0 (lighter shades) indicate strong support for the time-stratified model. The light grey areas at the top and bottom of the graphs are the zones where the support for one of the alternative models is decisive. The dashed vertical line indicates the boundary between time slices in the time-stratified analysis. Numbers at the top and bottom of the graph are the number of trees supporting each model, and the median support relative to the alternative model. Trees in which the split between *S. utriformis* and its sister species are older than 15 Myr fit better to an unconstrained scenario allowing occupation of the Galapagos before that time.



**Figure 6.** Relationship between AIC weight of the time-stratified biogeographic model allowing dispersal only during the last 15 Myr (relative to the time-stratified model allowing dispersal only during the last 3.5 Myr) and the age of split of *Sicarius utriformis* (from Galapagos) and its sister species. Each dot represents an individual tree of a sample of 100 taken from the posterior distribution of a Bayesian analysis; the star represents the maximum clade credibility tree. Values of AIC weight close to 1 (darker shades) indicate strong support for the 15 Myr model, while values close to 0 (lighter shades) indicate strong support for the 3.5 Myr model. The light grey areas at the top and bottom of the graphs are the zones where the support for one of the alternative models is decisive. The dashed vertical lines indicate the boundary between time slices in each of the time-stratified models. Numbers at the top and bottom of the graph are the number of trees supporting each model, and the median support relative to the alternative model. With few exceptions, most trees fit decisively better to a model allowing for dispersal in the last 15 Myr, regardless of the age of the split.



**Figure 7.** Histograms with the inferred age of dispersal of *Sicarius* to the Caatinga. Analyses based on a maximum clade credibility tree (MCC tree) (a, b) produce sharper estimates closely tied to the ages of cladogenetic events in this tree. This is especially notable in the model including founder-event speciation (a), which displays four peaks, each associated with the age of the four successive nodes in the tree that could have originated the founder-event dispersal to the Caatinga. Accounting for uncertainty in topology and age estimates (c, d) reveals that the age of dispersal is much more uncertain.
